# Supplementary material for: Cognitive Emotion Regulation Questionnaire—Short: Reliability, Validity, and Measurement Invariance of the Italian Version
Source: MDPI journal article supplement (doi:10.3390/bs12120474), 2022-11-24
Supplement: s1 [file s1]

## SUPPLEMENTARY DOCUMENT 1

| Subscales and items                                                          | Mean | SD   | Skewness (SE) | Kurtosis (SE) |
|------------------------------------------------------------------------------|------|------|---------------|---------------|
| <u>Self-blame</u>                                                            |      |      |               |               |
| I feel that I am the one who is responsible for what has happened            | 2.87 | 1.01 | 0.06 (0.11)   | -0.60 (0.23)  |
| I think that basically the cause must lie within myself                      | 2.00 | 1.00 | 0.91 (0.11)   | 0.34 (0.23)   |
| <u>Acceptance</u>                                                            |      |      |               |               |
| I think that I have to accept that this has happened                         | 3.48 | 0.99 | -0.29 (0.11)  | -0.42 (0.23)  |
| I think that I have to accept the situation                                  | 3.44 | 1.04 | -0.32 (0.11)  | -0.48 (0.23)  |
| <u>Rumination</u>                                                            |      |      |               |               |
| I often think about how I feel about what I have experienced                 | 3.50 | 1.12 | -0.44 (0.11)  | -0.58 (0.23)  |
| I am preoccupied with what I think and feel about what I have experienced    | 3.28 | 1.11 | -0.29 (0.11)  | -0.58 (0.23)  |
| <u>Positive refocusing</u>                                                   |      |      |               |               |
| I think of pleasant things that have nothing to do with it                   | 2.28 | 1.08 | 0.70 (0.11)   | -0.20 (0.23)  |
| I think of something nice instead of what has happened                       | 2.14 | 0.99 | 0.74 (0.11)   | -0.05 (0.23)  |
| <u>Refocus on planning</u>                                                   |      |      |               |               |
| I think about how to change the situation                                    | 3.75 | 0.91 | -0.22 (0.11)  | -0.65 (0.23)  |
| I think about a plan of what I can do best                                   | 3.73 | 0.98 | -0.37 (0.11)  | -0.65 (0.23)  |
| <u>Positive reappraisal</u>                                                  |      |      |               |               |
| I think I can learn something from the situation                             | 4.06 | 0.95 | -0.95 (0.11)  | 0.54 (0.23)   |
| I think that I can become a stronger person as a result of what has happened | 3.98 | 1.04 | -0.79 (0.11)  | -0.12 (0.23)  |
| <u>Putting into perspective</u>                                              |      |      |               |               |
| I think that it hasn't been too bad compared to other things                 | 2.95 | 1.09 | 0.04 (0.11)   | -0.65 (0.23)  |
| I tell myself that there are worse things in life                            | 3.24 | 1.20 | -0.19 (0.11)  | -0.88 (0.23)  |
| <u>Catastrophizing</u>                                                       |      |      |               |               |
| I keep thinking about how terrible it is what I have experienced             | 2.36 | 1.08 | 0.50 (0.11)   | -0.44 (0.23)  |
| I continually think how horrible the situation has been                      | 2.14 | 1.09 | 0.73 (0.11)   | -0.29 (0.23)  |
| <u>Other-blame</u>                                                           |      |      |               |               |
| I feel that others are responsible for what has happened                     | 2.25 | 0.98 | 0.49 (0.11)   | -0.32 (0.23)  |
| I feel that basically the cause lies with others                             | 1.53 | 0.78 | 1.69 (0.11)   | 3.34 (0.23)   |

Table S1. Items' statistics of the CERQ-IS. Abbreviations: CERQ-IS, Italian short version of the cognitive emotion regulation questionnaire; SD, standard deviation; SE standard error.

| Latent factor                | 1       | 2       | 3      | 4      | 5       | 6       | 7     | 8      | 9 |
|------------------------------|---------|---------|--------|--------|---------|---------|-------|--------|---|
| 1. Self-blame                |         |         |        |        |         |         |       |        |   |
| 2. Acceptance                | -.130*  |         |        |        |         |         |       |        |   |
| 3. Rumination                | .425**  | .035    |        |        |         |         |       |        |   |
| 4. Positive refocusing       | -.183** | .194**  | -.144* |        |         |         |       |        |   |
| 5. Refocus on planning       | -.188** | .221**  | .070   | .222** |         |         |       |        |   |
| 6. Positive reappraisal      | -.187** | .385**  | .083   | .198** | .602**  |         |       |        |   |
| 7. Putting into perspective. | -.080   | .212**  | -.086  | .365** | .306**  | .401**  |       |        |   |
| 8. Catastrophizing           | .431**  | -.163** | .505** | -.143* | -.175** | -.228** | -.133 |        |   |
| 9. Other-blame               | .105    | -.067   | .211** | .138*  | -.059   | -.112   | .026  | .275** |   |

Table S2. Inter-correlations among latent factors of the CERQ-IS. \*\*  $p < .01$ ; \*  $p < .05$ . Abbreviations: CERQ-IS, Italian short version of the cognitive emotion regulation questionnaire.

| CERQ-IS subscale            | Full CERQ subscale |        |        |         |         |         |         |         |        |
|-----------------------------|--------------------|--------|--------|---------|---------|---------|---------|---------|--------|
|                             | 1                  | 2      | 3      | 4       | 5       | 6       | 7       | 8       | 9      |
| 1. Self-blame               | .895**             | .029   | .319** | -.195** | -.172** | -.180*  | -.079   | .301**  | .074   |
| 2. Acceptance               | -.063              | .812** | .040   | .161**  | .239**  | .349**  | .205**  | -.112*  | -.042  |
| 3. Rumination               | .380**             | .139** | .895** | -.099*  | .018    | -.045   | -.103*  | .299**  | .175** |
| 4. Positive refocusing      | -.185**            | .079   | -.097* | .952**  | .202**  | .245**  | .331**  | -.043   | .131** |
| 5. Refocus on planning      | -.122*             | -.055  | .104*  | .228**  | .936**  | .468**  | .255**  | -.131** | -.039  |
| 6. Positive reappraisal     | -.089              | .145** | .105*  | .217**  | .524**  | .875**  | .328**  | -.170** | -.076  |
| 7. Putting into perspective | -.078              | .108*  | -.115* | .358**  | .286**  | .395**  | .940**  | -.069   | .022   |
| 8. Catastrophizing          | .349**             | .053   | .359** | -.181** | -.201** | -.328** | -.147** | .908**  | .264** |
| 9. Other-blame              | .064               | .019   | .118*  | .108*   | -.086   | -.096*  | -.003   | .258**  | .917** |

Table S3. Pearson's correlations between CERQ-IS and full CERQ subscales. \*\*  $p < .01$ ; \*  $p < .05$ . Abbreviations: CERQ, cognitive emotion regulation questionnaire; CERQ-IS, Italian short version of the cognitive emotion regulation questionnaire.

| Subscales and items                                                          | Males | Females |
|------------------------------------------------------------------------------|-------|---------|
| <u>Self-blame</u>                                                            |       |         |
| I feel that I am the one who is responsible for what has happened            | .586  | .685    |
| I think that basically the cause must lie within myself                      | .870  | .816    |
| <u>Acceptance</u>                                                            |       |         |
| I think that I have to accept that this has happened                         | .917  | .937    |
| I think that I have to accept the situation                                  | .707  | .893    |
| <u>Rumination</u>                                                            |       |         |
| I often think about how I feel about what I have experienced                 | .612  | .716    |
| I am preoccupied with what I think and feel about what I have experienced    | .623  | .735    |
| <u>Positive refocusing</u>                                                   |       |         |
| I think of pleasant things that have nothing to do with it                   | .886  | .782    |
| I think of something nice instead of what has happened                       | .852  | .862    |
| <u>Refocus on planning</u>                                                   |       |         |
| I think about how to change the situation                                    | .712  | .797    |
| I think about a plan of what I can do best                                   | .750  | .787    |
| <u>Positive reappraisal</u>                                                  |       |         |
| I think I can learn something from the situation                             | .814  | .758    |
| I think that I can become a stronger person as a result of what has happened | .770  | .721    |
| <u>Putting into perspective</u>                                              |       |         |
| I think that it hasn't been too bad compared to other things                 | .762  | .737    |
| I tell myself that there are worse things in life                            | .979  | .909    |
| <u>Catastrophizing</u>                                                       |       |         |
| I keep thinking about how terrible it is what I have experienced             | .864  | .899    |
| I continually think how horrible the situation has been                      | .875  | .834    |
| <u>Other-blame</u>                                                           |       |         |
| I feel that others are responsible for what has happened                     | .815  | .825    |
| I feel that basically the cause lies with others                             | .784  | .688    |

Table S4. Factor loadings of the CERQ-IS obtained from the scalar invariance model (gender as grouping variable). Abbreviations: CERQ-IS, Italian short version of the cognitive emotion regulation questionnaire.

| Subscales and items                                                          | Adolescents | Young adults |
|------------------------------------------------------------------------------|-------------|--------------|
| <u>Self-blame</u>                                                            |             |              |
| I feel that I am the one who is responsible for what has happened            | 0.661       | 0.623        |
| I think that basically the cause must lie within myself                      | 0.800       | 0.879        |
| <u>Acceptance</u>                                                            |             |              |
| I think that I have to accept that this has happened                         | 0.905       | 0.967        |
| I think that I have to accept the situation                                  | 0.783       | 0.805        |
| <u>Rumination</u>                                                            |             |              |
| I often think about how I feel about what I have experienced                 | 0.699       | 0.716        |
| I am preoccupied with what I think and feel about what I have experienced    | 0.653       | 0.686        |
| <u>Positive refocusing</u>                                                   |             |              |
| I think of pleasant things that have nothing to do with it                   | 0.680       | 0.727        |
| I think of something nice instead of what has happened                       | 0.895       | 0.949        |
| <u>Refocus on planning</u>                                                   |             |              |
| I think about how to change the situation                                    | 0.752       | 0.756        |
| I think about a plan of what I can do best                                   | 0.854       | 0.792        |
| <u>Positive reappraisal</u>                                                  |             |              |
| I think I can learn something from the situation                             | 0.778       | 0.822        |
| I think that I can become a stronger person as a result of what has happened | 0.690       | 0.686        |
| <u>Putting into perspective</u>                                              |             |              |
| I think that it hasn't been too bad compared to other things                 | 0.739       | 0.835        |
| I tell myself that there are worse things in life                            | 0.744       | 0.841        |
| <u>Catastrophizing</u>                                                       |             |              |
| I keep thinking about how terrible it is what I have experienced             | 0.809       | 0.877        |
| I continually think how horrible the situation has been                      | 0.836       | 0.858        |
| <u>Other-blame</u>                                                           |             |              |
| I feel that others are responsible for what has happened                     | 0.722       | 0.892        |
| I feel that basically the cause lies with others                             | 0.490       | 0.661        |

Table S5. Factor loadings of the CERQ-IS obtained from the scalar invariance model (age as grouping variable). Abbreviations: CERQ-IS, Italian short version of the cognitive emotion regulation questionnaire.
